# Supplementary material for: Isoquercitrin induces apoptosis and autophagy in hepatocellular carcinoma cells via AMPK/mTOR/p70S6K signaling pathway
Source: publisher site journal article supplement (doi:10.18632/aging.202237), 2020-11-29
Supplement: Supplementary file [file aging-v12i23-202237-supplementary-material-SD1.pdf]

SUPPLEMENTARY FIGURE

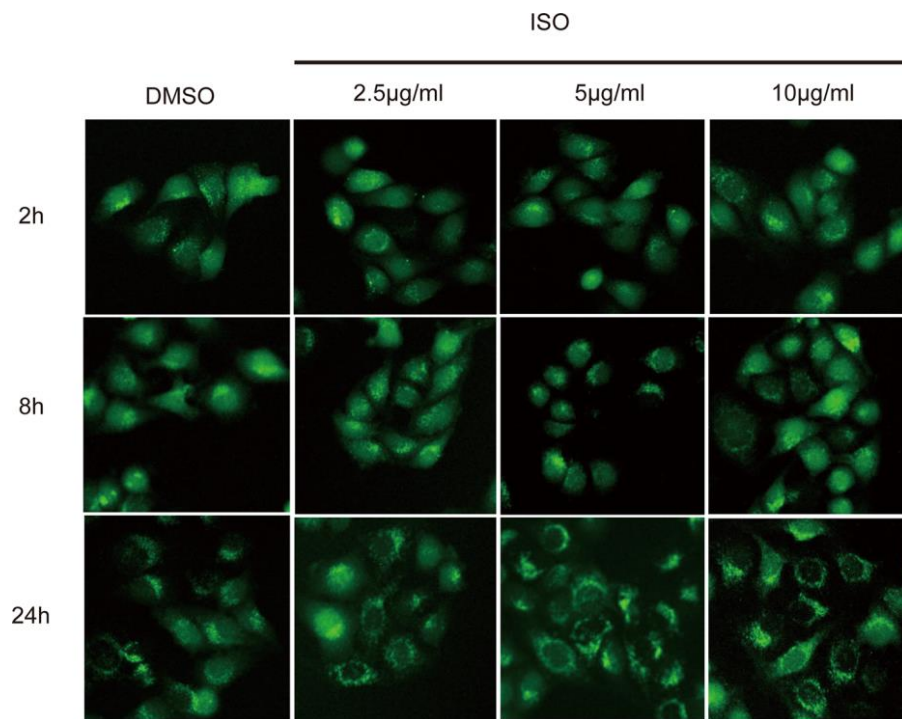

Supplementary Figure 1. GFP-LC3 puncta in ISO-treated Hela cells.
